# Supplementary material for: Metagenomic Analysis of the Gut Microbiome Reveals Enrichment of Menaquinones (Vitamin K2) Pathway in Diabetes Mellitus
Source: PubMed Central journal article supplement — Diabetes Metab J. 2020 May 11;45(1):77–85. doi: 10.4093/dmj.2019.0202 (PMC7850878; doi:10.4093/dmj.2019.0202), 2020-05-11
Supplement: dmj-2019-0202-s001.pdf [file dmj-2019-0202-s001.pdf]

**Supplementary Table 1.** Categorization of subjects based on their diet and disease status

| Subjects    | Diet          |               |
|-------------|---------------|---------------|
|             | HFD           | LFD           |
| Healthy     | C3, C13, C10  | C6, C7, C11   |
| T2DM        |               |               |
| HbA1c >6.5% | P3, P4, P8    | P6, P17, P38  |
| HbA1c <6.5% | P21, P24, P35 | P15, P27, P30 |

HFD, high fiber diet; LFD, low fiber diet; T2DM, type 2 diabetes mellitus; HbA1c, glycosylated hemoglobin.
