# Supplementary material for: Metagenomic Analysis of the Gut Microbiome Reveals Enrichment of Menaquinones (Vitamin K2) Pathway in Diabetes Mellitus
Source: PubMed Central journal article supplement — Diabetes Metab J. 2020 May 11;45(1):77–85. doi: 10.4093/dmj.2019.0202 (PMC7850878; doi:10.4093/dmj.2019.0202), 2020-05-11
Supplement: dmj-2019-0202-s003.pdf [file dmj-2019-0202-s003.pdf]

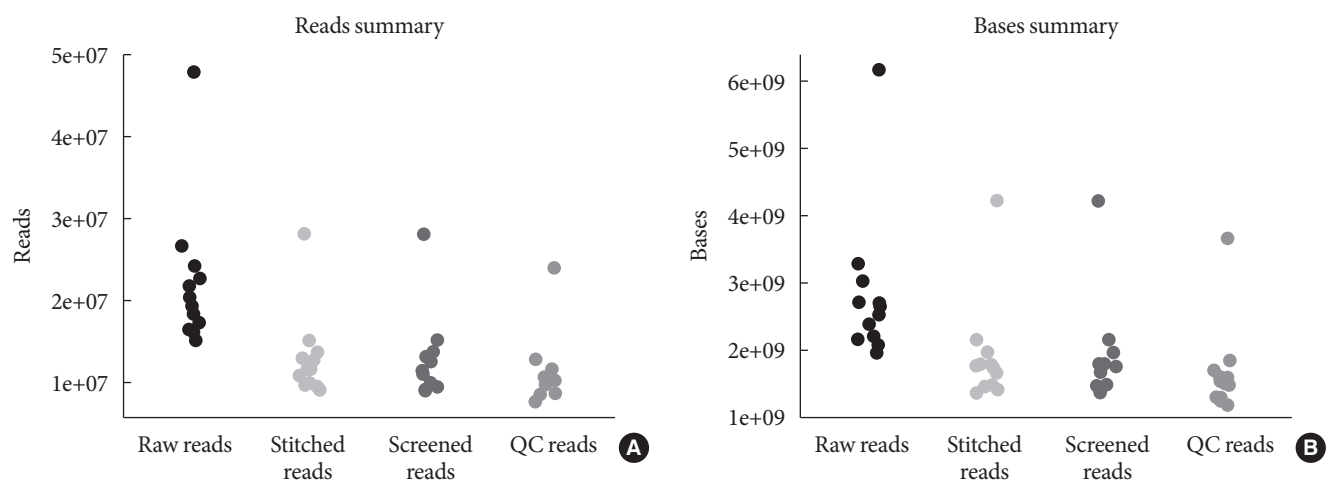

**Supplementary Fig. 1.** Bacterial Sequencing and processing. (A) Around 33.91 Gbases sequences were generated by Illumina NextSeq using  $2 \times 150$  paired-end reads. (B) Each sample yielded a median of 1.9 Gbases. Sequenced were trimmed and stitched reads mapped to the human genome were removed (42.12%, 0.05%). After quality control, the median number of quality-filtered reads per samples was 10,164,901.
