# Supplementary material for: Metagenomic Analysis of the Gut Microbiome Reveals Enrichment of Menaquinones (Vitamin K2) Pathway in Diabetes Mellitus
Source: PubMed Central journal article supplement — Diabetes Metab J. 2020 May 11;45(1):77–85. doi: 10.4093/dmj.2019.0202 (PMC7850878; doi:10.4093/dmj.2019.0202), 2020-05-11
Supplement: dmj-2019-0202-s004.pdf [file dmj-2019-0202-s004.pdf]

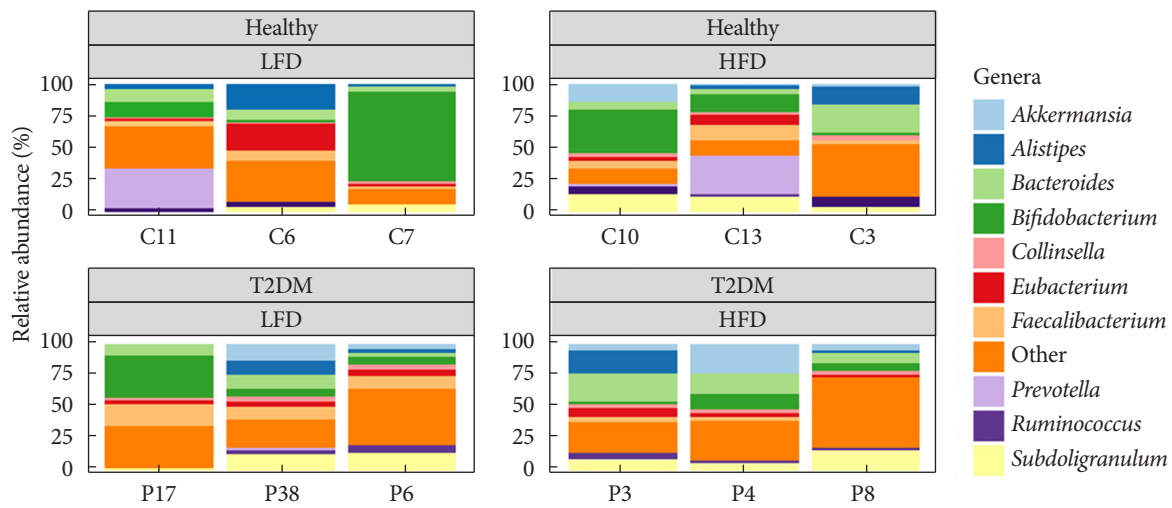

**Supplementary Fig. 2.** Bacterial summary taxonomic composition. High quality reads classified using Greengenes v. 13\_8 as the reference database. For each taxonomic rank, we aggregated operational taxonomic units then plotted the relative abundance of the most prevalent genera for healthy and type 2 diabetes mellitus (T2DM) with relation to diet, high fiber diet (HFD) and low fiber diet (LFD).
